# Supplementary material
Source: publisher figshare collection journal article supplement (https://frontiersin.figshare.com/ndownloader/files/28848822)
Supplement: Supplementary file 1 [file 28848822]

## Sheet: Table A1
	Table A1.
	Effects of the gap between scientific literacy and perceived understanding of COVID-19 vaccines/preventive behavior on attitudes toward vaccine and preventive behaviors.
							95% CI
	Dependent	Independent	β	SE	t	p	lower	upper	R2
	Attitude toward COVID-19 vaccines	Gap between subjective knowledge of vaccine and scientific literacy	0.069	0.045	1.54	0.12	-0.019	0.157	0.005
	Attitude toward COVID-19 preventive behavior	Gap between subjective knowledge of vaccine and scientific literacy	0.032	0.045	0.723	0.47	-0.056	0.12	0.001
